# Supplementary material for: Filled trivacant icosahedra as building fragments in 17-atom endohedral germanides [TM2@Ge17]n−(TM= Co, Ni)
Source: Royal Society of Chemistry journal article supplement (doi:10.1039/d1dt03078g), 2021-01-01
Supplement: d1dt03078g1.pdf [file d1dt03078g1.pdf]

## Filled Trivacant Icosahedra as Building Fragments in 17-atomic Endohedral Germanides $[TM_2@Ge_{17}]^{n-}$ ( $TM = Co, Ni$ )

Christoph Wallach, Yasmin Selic, Dr. Benedikt J. L. Witzel, Dr. Wilhelm Klein, Prof. Dr. Thomas F. Fässler

e-mail: thomas.faessler@lrz.tum.de

### Supporting information

|                                                             |    |
|-------------------------------------------------------------|----|
| 1. Experimental details .....                               | 1  |
| 2. Crystallographic details .....                           | 3  |
| 3. ESI MS sample preparation and spectra of <b>2a</b> ..... | 11 |
| 4. EDX analysis .....                                       | 13 |
| 5. Computational details.....                               | 14 |
| 6. References .....                                         | 23 |

## 1. Experimental details

### General

All experiments were carried out under oxygen-free, dry conditions using standard glove box and Schlenk line techniques. Glassware was dried prior to use by heating it *in vacuo*. The solid-state phase  $K_4Ge_9$  is prepared by fusion of stoichiometric amounts of the elements in a stainless-steel autoclave at 650 °C. The phase of nominal composition " $K_5Co_{1.2}Ge_9$ "<sup>1</sup> and the titanyl complex  $[Cp_2Ti(NH_3)_2]Cl(NH_3)_2$  are prepared according to the literature.  $Ni(cod)_2$  (*Sigma Aldrich*, stored at -30 °C under Ar) is used without further purification. Liquid ammonia was dried over sodium metal, and [2.2.2]crypt (*Merck*) was dried overnight applying dynamic vacuum before usage. Ethylenediamine (en) was dried over  $CaH_2$  at 120 °C for two days prior to distillation, toluene was obtained from an MBraun Grubbs apparatus and stored over molecular sieve.

### ESI MS analysis

ESI MS analyses were performed on a Bruker Daltonic HCT mass spectrometer (dry gas temperature: 300 °C; injection speed: 300  $\mu$ L/h), and the data evaluation was carried out using the Bruker Compass Data Analysis 4.0 SP 5 program (Bruker). Spectra were plotted using OriginPro2016G (Origin Lab) and Excel 2016 (Microsoft).

### EDX analysis

EDX measurements were performed using a Hitachi TM-1000 tabletop spectroscopy. Data evaluation was performed using the SWIFT-ED-TM program (Oxford Instruments).

### Single crystal structure determination

Air- and moisture-sensitive crystals of **1** and **3** were transferred from the mother liquor into cooled perfluoroalkyl ether oil and isolated from polycrystalline material under a cooled stream of nitrogen.<sup>3</sup> Crystals of **2** were selected under a microscope in the glove box. For diffraction data collection, the single crystals were mounted on a glass capillary and positioned in a 150 K cold  $N_2$  gas stream. Data collection was performed with a STOE StadiVari diffractometer (Mo  $K\alpha$  radiation) equipped with a DECTRIS PILATUS 300K detector. Structures were solved by Direct Methods (SHELXS-97) and refined by full-matrix least-squares calculations against  $F^2$  (SHELXL-2014 or SHELXL-2018).<sup>4</sup> The hydrogen atoms were positioned in calculated positions and refined using a riding model. Unless stated otherwise, all non-hydrogen atoms were treated with anisotropic displacement parameters. Cluster volumes were calculated using VESTA.<sup>5</sup> Further details of the crystal structure investigations may be obtained from the joint CCDC/FIZ Karlsruhe online deposition service: <https://www.ccdc.cam.ac.uk/structures/> by quoting the depository numbers CCDC-2081217 (**1**), CCDC-2081218 (**2**), and CCDC-2081219 (**3**). The crystallographic data for compounds **1** - **3** are summarized in Table S1.

## Quantum chemical calculations

Quantum chemical calculations were performed with the TURBOMOLE program package,<sup>6</sup> using the PBE0 hybrid density functional method<sup>7, 8</sup> and polarized triple- $\zeta$ -valence Karlsruhe basis sets (DFT-PBE0/TZVP with def2-TZVP on Ge and Ni/Co).<sup>9</sup> Multipole-accelerated resolution-of-the-identity technique was used to speed up the calculations.<sup>10-12</sup>  $m4$  integration grid was applied for the numerical integration of the exchange-correlation functional. As initial structures the data of the crystal structure determinations of compounds **1a** and **2a** were used. The structures were optimized without any symmetry constraints. A COSMO solvent field was applied to counter the anionic charge.<sup>13</sup>

## Synthesis of compounds 1 – 3

### **[K([2.2.2]crypt)]<sub>2</sub>K<sub>4</sub>[Co<sub>2</sub>@Ge<sub>17</sub>] · 15 NH<sub>3</sub> (1)**

"K<sub>5</sub>Co<sub>1.2</sub>Ge<sub>9</sub>" (100 mg, 0.113 mmol, 1 equiv.), [Cp<sub>2</sub>Ti(NH<sub>3</sub>)<sub>2</sub>]Cl(NH<sub>3</sub>) (28 mg, 0.113 mmol, 1 equiv.) and [2.2.2]crypt (76.8 mg, 0.204 mmol, 1.8 equiv.) were weighed into a Schlenk tube. Subsequently liquid ammonia (5 mL) was condensed onto the solid mixture leading to the formation of a deep red solution. A black crystal suitable for single crystal X-ray diffraction could be isolated after 6 months.

### **[K([2.2.2]crypt)]<sub>4</sub>[Ni<sub>2</sub>@Ge<sub>17</sub>] · en (2)**

The synthesis generally followed the method applied by Sevov and co-workers for the synthesis of the cluster unit [Ni<sub>3</sub>@Ge<sub>18</sub>]<sup>4-</sup>.<sup>14</sup>

K<sub>4</sub>Ge<sub>9</sub> (121.6 mg, 150.1 mmol, 1 equiv.), Ni(cod)<sub>2</sub> (90.8 mg, 330.1 mmol 2.2 equiv.) and [2.2.2]crypt (169.4 mg, 450.0 mmol, 3 equiv.) were weighted into a Schlenk tube, and en (2.5 mL) was added via a syringe. After stirring the reaction for 2 h, the dark suspension was filtered over a glass filter-packed pipette, and the resulting filtrate was carefully layered with toluene (2 mL). After two month of crystallization time, small amounts of brown, block-shaped single crystals were collected (crystalline yield approximately 5 % based on the [Ge<sub>9</sub>] precursor).

**ESI MS:**  $m/z$  1352.5 for [Ni<sub>2</sub>@Ge<sub>17</sub>]<sup>-</sup> and  $m/z$  1767.8 for [K([2.2.2]crypt)][Ni<sub>2</sub>@Ge<sub>17</sub>]<sup>-</sup>. **EDX:** K, Ni, Ge (qualitative).

### **[K(2.2.2-crypt)]<sub>3</sub>[Co@Ge<sub>10</sub>] · 9 NH<sub>3</sub> (3)**

A black crystal of **3** suitable for single crystal X-ray diffraction was isolated after 5 months from the same reaction solution from which [K([2.2.2]crypt)]<sub>2</sub>K<sub>4</sub>[Co<sub>2</sub>@Ge<sub>17</sub>] · 15 NH<sub>3</sub> (**1**) was isolated one month later. Since crystals can only be isolated from liquid ammonia one after another it is not entirely clear if the 10-atom cluster formed simultaneously with anion **1a** or if **1a** formed due to opening the reaction flask.

## 2. Crystallographic details

**Table S1.** Crystallographic data of compounds **1** – **3**.

| Compound                                                        | <b>1</b>                                  | <b>2</b>                                  | <b>3</b>                                |
|-----------------------------------------------------------------|-------------------------------------------|-------------------------------------------|-----------------------------------------|
| formula                                                         | $K_6N_{19}O_{12}C_{36}H_{117}Co_2Ge_{17}$ | $K_4N_{10}O_{24}C_{74}H_{152}Ni_2Ge_{17}$ | $K_3N_{15}O_{18}C_{54}H_{134}CoGe_{10}$ |
| fw / g·mol <sup>-1</sup>                                        | 2594.97                                   | 3073.9                                    | 2184.89                                 |
| space group                                                     | <i>P</i> 2 <sub>1</sub> / <i>c</i>        | <i>C</i> 2/ <i>c</i>                      | <i>P</i> $\bar{1}$                      |
| <i>a</i> / Å                                                    | 19.6865(6)                                | 27.8606(5)                                | 12.414(2)                               |
| <i>b</i> / Å                                                    | 32.1696(10)                               | 16.5164(2)                                | 16.140(2)                               |
| <i>c</i> / Å                                                    | 15.3982(4)                                | 27.9518(4)                                | 25.212(3)                               |
| $\alpha$ / deg                                                  | 90                                        | 90                                        | 72.851(9)                               |
| $\beta$ / deg                                                   | 110.634(2)                                | 117.468(1)                                | 89.887(9)                               |
| $\gamma$ / deg                                                  | 90                                        | 90                                        | 70.505(9)                               |
| <i>V</i> / Å <sup>3</sup>                                       | 9126.2(5)                                 | 11412.2(3)                                | 4524.1(9)                               |
| <i>Z</i>                                                        | 4                                         | 4                                         | 2                                       |
| <i>T</i> / K                                                    | 150                                       | 150(2)                                    | 150(2)                                  |
| $\lambda$ / Å                                                   | 0.71073                                   | 0.71073                                   | 0.71073                                 |
| $\rho_{\text{calcd}}$ / g·cm <sup>-3</sup>                      | 1.889                                     | 1.789                                     | 1.604                                   |
| $\mu$ / mm <sup>-1</sup>                                        | 6.181                                     | 4.932                                     | 3.649                                   |
| collected reflections                                           | 277912                                    | 155284                                    | 15796                                   |
| indep. reflections                                              | 17914                                     | 11191                                     | 13148                                   |
| <i>R</i> <sub>int</sub> / <i>R</i> <sub>σ</sub>                 | 0.1763/0.0555                             | 0.0487/0.0183                             | 0.0965/0.1500                           |
| parameters / restraints                                         | 834/6                                     | 614/19                                    | 910/104                                 |
| <i>R</i> <sub>1</sub> [ <i>I</i> > 2 σ( <i>I</i> ) / all data]  | 0.0472/0.0683                             | 0.0714/0.0873                             | 0.0757/ 0.1618                          |
| <i>wR</i> <sub>2</sub> [ <i>I</i> > 2 σ( <i>I</i> ) / all data] | 0.1053/0.1142                             | 0.1525/0.1648                             | 0.1682/0.2110                           |
| goodness of fit                                                 | 1.028                                     | 1.071                                     | 0.902                                   |
| max./min. diff. el. density /<br>e·Å <sup>-3</sup>              | 1.553/-1.455                              | 4.568/-3.875                              | 1.280/-1.651                            |
| CCDC                                                            | 2081217                                   | 2081218                                   | 2081219                                 |

**[K([2.2.2]crypt)]<sub>2</sub>K<sub>4</sub>[Co<sub>2</sub>@Ge<sub>17</sub>] · 15 NH<sub>3</sub> (1)****Table S2.** Selected interatomic distances and angles in anion **1a**.

| <b>Atoms</b> | <b>distance / Å</b> | <b>atoms</b> | <b>distance / Å</b> |
|--------------|---------------------|--------------|---------------------|
| Ge1-Ge2      | 2.6374(9)           | Ge1-Co1      | 2.4317(9)           |
| Ge1-Ge3      | 2.8083(9)           | Ge2-Co1      | 2.4421(9)           |
| Ge1-Ge4      | 2.6244(9)           | Ge3-Co1      | 2.4618(9)           |
| Ge1-Ge5      | 2.9199(9)           | Ge4-Co1      | 2.4484(9)           |
| Ge1-Ge6      | 2.8851(9)           | Ge5-Co1      | 2.4021(10)          |
| Ge2-Ge3      | 2.6682(9)           | Ge6-Co1      | 2.3940(9)           |
| Ge2-Ge6      | 2.7221(9)           | Ge7-Co1      | 2.4167(10)          |
| Ge2-Ge7      | 2.6768(9)           | Ge8-Co1      | 2.3934(9)           |
| Ge3-Ge4      | 2.6963(10)          | Ge9-Co1      | 2.1924(9)           |
| Ge3-Ge7      | 2.7359(9)           | Ge9-Co2      | 2.1998(9)           |
| Ge3-Ge8      | 2.7664(10)          | Ge10-Co2     | 2.3927(10)          |
| Ge4-Ge5      | 2.7229(9)           | Ge11-Co2     | 2.4041(9)           |
| Ge4-Ge8      | 2.6719(10)          | Ge12-Co2     | 2.4184(10)          |
| Ge5-Ge6      | 2.6099(9)           | Ge13-Co2     | 2.3932(9)           |
| Ge5-Ge9      | 2.9316(9)           | Ge14-Co2     | 2.4528(10)          |
| Ge6-Ge9      | 2.8983(9)           | Ge15-Co2     | 2.4481(9)           |
| Ge7-Ge8      | 2.6264(9)           | Ge16-Co2     | 2.4412(9)           |
| Ge7-Ge9      | 2.9589(9)           | Ge17-Co2     | 2.4385(10)          |
| Ge8-Ge9      | 2.9763(9)           |              |                     |
| Ge9-Ge10     | 2.9301(9)           |              |                     |
| Ge9-Ge11     | 2.9376(9)           |              |                     |
| Ge9-Ge12     | 2.9303(9)           |              |                     |
| Ge9-Ge13     | 2.9056(9)           |              |                     |
| Ge10-Ge11    | 2.6510(9)           |              |                     |
| Ge10-Ge14    | 2.7027(9)           |              |                     |
| Ge10-Ge15    | 2.7903(9)           |              |                     |
| Ge11-Ge17    | 2.6637(9)           |              |                     |
| Ge12-Ge13    | 2.6061(9)           | <b>atoms</b> | <b>angle / deg</b>  |
| Ge12-Ge17    | 2.6638(9)           | Co1-Ge9-Co2  | 166.9(1)            |
| Ge13-Ge14    | 2.7351(10)          |              |                     |
| Ge13-Ge16    | 2.8129(9)           |              |                     |
| Ge14-Ge15    | 2.6567(10)          |              |                     |
| Ge14-Ge16    | 2.6609(10)          |              |                     |
| Ge15-Ge16    | 2.7542(9)           |              |                     |
| Ge15-Ge17    | 2.7170(10)          |              |                     |
| Ge16-Ge17    | 2.6751(9)           |              |                     |

**[K([2.2.2]crypt)]<sub>4</sub>[Ni<sub>2</sub>@Ge<sub>17</sub>] · en (2)**

Atoms Ge5, C38 and N6 were refined using an ISOR (0.01) command; the distance between C38 and N6 was restrained with a DFIX (1.5) command.

The high maximum and minimum difference electron density is mainly located in close distance around Ge5 indicating a more complex disorder than described by the present refinement. However, a refinement with the Ge5 atom at more than the given split positions was not successful. A refinement with other elements than Ge (e.g. Ni) on position Ge5 resulted in worse reliability factors.

**Table S3.** Selected interatomic distances and angles in **2a**. Symmetry operation (i): 1-x, y, 0.5-z.

| atoms                              | distance / Å | atoms   | distance / Å |
|------------------------------------|--------------|---------|--------------|
| Ge1-Ge2                            | 2.683(1)     | Ge1-Ni1 | 2.433(1)     |
| Ge1-Ge2 <sup>i</sup>               | 2.676(1)     | Ge2-Ni1 | 2.462(1)     |
| Ge1-Ge3                            | 2.869(1)     | Ge3-Ni1 | 2.411(1)     |
| Ge1-Ge4                            | 2.825(1)     | Ge4-Ni1 | 2.422(1)     |
| Ge1-Ge1 <sup>i</sup>               | 2.713 (2)    | Ge5-Ni1 | 2.236(3)     |
| Ge1-Ge2 <sup>i</sup>               | 2.676(1)     | Ge5-Ni2 | 2.144(3)     |
| Ge1 <sup>i</sup> -Ge2              | 2.676(1)     | Ge6-Ni2 | 2.390(1)     |
| Ge1 <sup>i</sup> -Ge2 <sup>i</sup> | 2.683(1)     | Ge7-Ni2 | 2.390(1)     |
| Ge1 <sup>i</sup> -Ge3 <sup>i</sup> | 2.869(1)     | Ge8-Ni2 | 2.435(1)     |
| Ge1 <sup>i</sup> -Ge4 <sup>i</sup> | 2.825(1)     | Ge9-Ni2 | 2.394(1)     |
| Ge2-Ge3                            | 2.667(1)     | Ni1-Ni2 | 4.215(2)     |
| Ge2-Ge4 <sup>i</sup>               | 2.725(1)     |         |              |
| Ge2 <sup>i</sup> -Ge4              | 2.725(1)     |         |              |
| Ge2 <sup>i</sup> -Ge3 <sup>i</sup> | 2.667(1)     |         |              |
| Ge3-Ge4                            | 2.622(1)     |         |              |
| Ge3-Ge5 <sup>i</sup>               | 2.735(5)     |         |              |
| Ge3 <sup>i</sup> -Ge5              | 2.735(5)     |         |              |
| Ge3 <sup>i</sup> -Ge4 <sup>i</sup> | 2.622(1)     |         |              |
| Ge4-Ge5 <sup>i</sup>               | 2.501(4)     |         |              |
| Ge4 <sup>i</sup> -Ge5              | 2.501(4)     |         |              |
| Ge5-Ge7                            | 2.415(4)     |         |              |
| Ge5-Ge6 <sup>i</sup>               | 2.799(6)     |         |              |
| Ge5 <sup>i</sup> -Ge6              | 2.903(6)     |         |              |
| Ge5 <sup>i</sup> -Ge7 <sup>i</sup> | 2.411(4)     |         |              |
| Ge6-Ge7                            | 2.589(1)     |         |              |
| Ge6-Ge8                            | 2.657(1)     |         |              |
| Ge6-Ge9                            | 2.896(1)     |         |              |
| Ge6 <sup>i</sup> -Ge7 <sup>i</sup> | 2.589(1)     |         |              |
| Ge6 <sup>i</sup> -Ge8 <sup>i</sup> | 2.657(1)     |         |              |
| Ge6 <sup>i</sup> -Ge9 <sup>i</sup> | 2.896(1)     |         |              |
| Ge7-Ge8 <sup>i</sup>               | 2.706(2)     |         |              |
| Ge7 <sup>i</sup> -Ge8              | 2.706(2)     |         |              |
| Ge7 <sup>i</sup> -Ge9 <sup>i</sup> | 2.833(2)     |         |              |
| Ge8-Ge9                            | 2.696(2)     |         |              |
| Ge8-Ge9 <sup>i</sup>               | 2.681(1)     |         |              |
| Ge8 <sup>i</sup> -Ge9              | 2.681(1)     |         |              |
| Ge8 <sup>i</sup> -Ge9 <sup>i</sup> | 2.696(2)     |         |              |
| Ge9-Ge9 <sup>i</sup>               | 2.704(2)     |         |              |

  

| atoms                     | angle / deg |
|---------------------------|-------------|
| Ni1-Ge5-Ni2               | 148.4(1)    |
| Ni1-Ge5 <sup>i</sup> -Ni2 | 148.4(1)    |

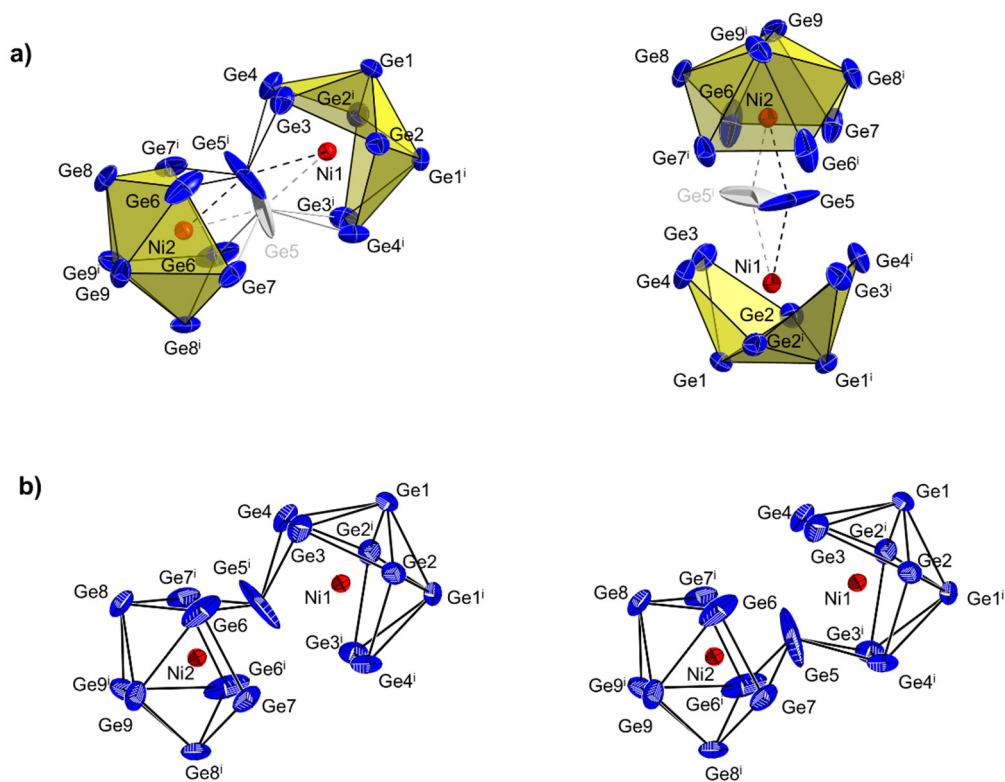

**Figure S1.** Different views of anion **2a**. a) Emphasis on the [Ge<sub>8</sub>] tubs forming the cluster and representation of the split position of Ge5 (site occupation factor of 0.5 each). b) Structure of anion **2a** emphasizing the single split positions. All atoms are represented with anisotropic displacement parameters at a 50 % probability level. Symmetry operation (i): 1-x, y, 0.5-z.

The novel cluster **2a** and the reported anion  $[\text{Ni}_3@\text{Ge}_{18}]^{4-}$ <sup>14</sup> show building principles similar to a  $C_{4v}$  symmetric  $[\text{Ge}_9]$  cluster (Figure S2).<sup>15</sup> However, the vertex atoms are dislocated from their original positions, which is caused by the incorporated Ni atoms resulting in elongated Ge-Ge distances. The longest distance between Ge atoms in the bare  $[\text{Ge}_9]$  cage (characterized from solid state) can be found between  $\text{Ge}5^{\text{A}}-\text{Ge}6^{\text{A}}$  with 2.88 Å<sup>15</sup> which is significantly shorter than the distances  $\text{Ge}6^{\text{i}}-\text{Ge}7$  (3.89 Å) in  $[\text{Ni}_2@\text{Ge}_{17}]^{4-}$  or  $\text{Ge}5^{\text{B}}-\text{Ge}6^{\text{B}}$  (3.66 Å) in  $[\text{Ni}_3@\text{Ge}_{18}]^{4-}$ .<sup>15</sup> Figure S2 gives a comparison of the different structural motifs. The most prominent difference between  $[\text{Ge}_9]^{4-}$ , **2a** and  $[\text{Ni}_3@\text{Ge}_{18}]^{4-}$  is that in the latter ion one Ge atom (drawn in yellow) is tilted out of the former pseudo square plane. This observation can be evaluated by measuring the dihedral angles of the plane which are  $\omega_{\text{Ge}1\text{A}-\text{Ge}2\text{A}-\text{Ge}3\text{A}-\text{Ge}4\text{A}} = 1.8^\circ$  ( $[\text{Ge}_9]^{4-}$ );  $\omega_{\text{Ge}5^{\text{i}}-\text{Ge}7^{\text{i}}-\text{Ge}6-\text{Ge}8} = 1.7^\circ$  (**2a**);  $\omega_{\text{Ge}1\text{B}-\text{Ge}2\text{B}-\text{Ge}3\text{B}-\text{Ge}4\text{B}} = 44.0^\circ$  ( $[\text{Ni}_3@\text{Ge}_{18}]^{4-}$ ).

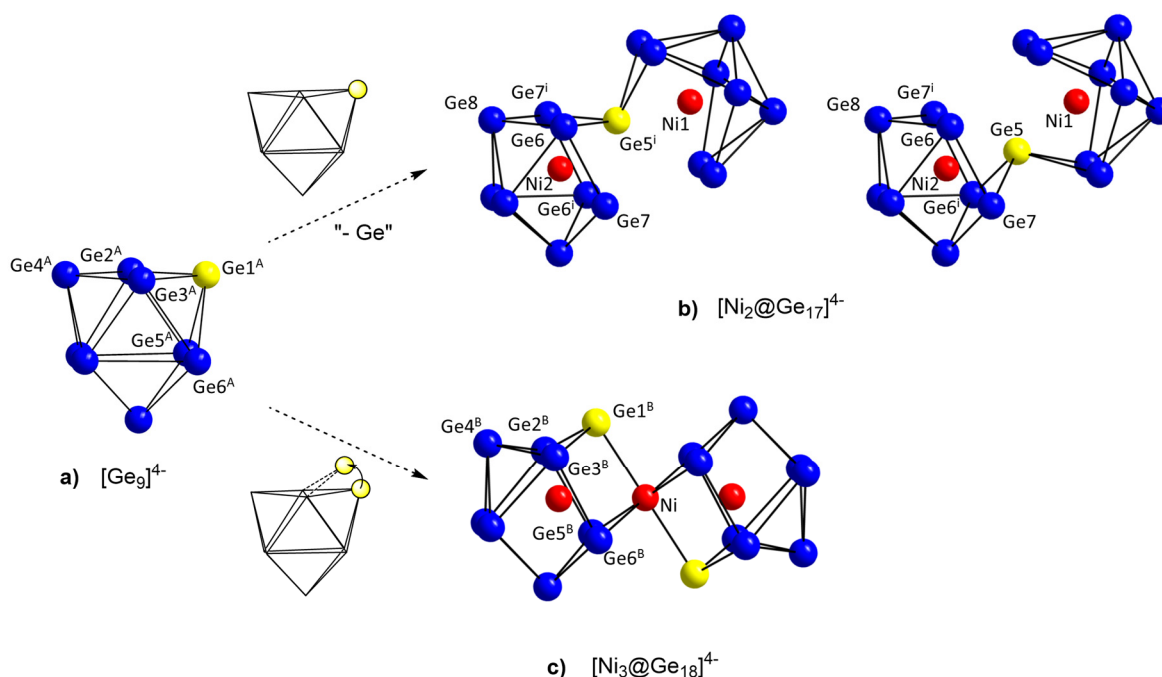

**Figure S2.** Representation of structural similarities and differences between a)  $[\text{Ge}_9]^{4-}$ ,<sup>[15]</sup> b) the novel cluster **2a** ( $[\text{Ni}_2@\text{Ge}_{17}]^{4-}$ ) and c) the known anion  $[\text{Ni}_3@\text{Ge}_{18}]^{4-}$ <sup>[14]</sup> with respect to the position of one vertex atom (with yellow color) of the pseudo square plane in  $[\text{Ge}_9]$ . Symmetry operation (i): 1-x, y, 0.5-z.



**Table S4.** Summary of interatomic distances, angles and cluster volumes in the anions **1a** and **2a** in comparison to literature data.

|                                                                                             | $d(E-E) / \text{\AA}$  | $d(TM-E) / \text{\AA}$ | $\sphericalangle (TM-E-TM) / \text{deg}$ | dihedral angle of rectangular planes / deg | volume / $\text{\AA}^3$ |
|---------------------------------------------------------------------------------------------|------------------------|------------------------|------------------------------------------|--------------------------------------------|-------------------------|
| <b>1a</b> [Co <sub>2</sub> @Ge <sub>17</sub> ] <sup>6-</sup>                                | 2.606(1) –<br>2.938(1) | 2.192(1) –<br>2.462(1) | 166.9(1)                                 | 14.0                                       | 26.68/<br>26.82         |
| <b>1a</b> optimized<br>(K <sub>4</sub> [Co <sub>2</sub> @Ge <sub>17</sub> ] <sup>2-</sup> ) | 2.631 –<br>2.938       | 2.184 –<br>2.446       | 168.9                                    | 11.7                                       | 26.35/<br>26.34         |
| <b>2a</b> [Ni <sub>2</sub> @Ge <sub>17</sub> ] <sup>4-</sup>                                | 2.415(4) –<br>2.903(6) | 2.144(3) –<br>2.462(1) | 148.4(1)                                 | 0.0                                        | 26.71/<br>25.86         |
| <b>2a</b> optimized<br>([Ni <sub>2</sub> @Ge <sub>17</sub> ] <sup>4-</sup> )                | 2.567 –<br>2.938       | 2.205 –<br>2.461       | 146.5                                    | 14.7                                       | 26.75/<br>26.69         |
| [Co@Ge <sub>9</sub> ] <sup>5- 1</sup>                                                       | 2.683 –<br>2.811       | 2.331 –<br>2.374       | –                                        | –                                          | 26.40                   |
| [Ni@Ge <sub>9</sub> ] <sup>3- 16</sup>                                                      | 2.558 –<br>2.876       | 2.254 –<br>2.410       | –                                        | –                                          | 25.17/<br>25.67         |
| [Ni <sub>2</sub> @Sn <sub>17</sub> ] <sup>4- 17</sup>                                       | 2.971 –<br>3.209       | 2.382 –<br>2.740       | 180                                      | 0.0                                        | –                       |
| [Rh <sub>2</sub> @Sn <sub>17</sub> ] <sup>6- 18</sup>                                       | 2.933 –<br>3.247       | 2.498 –<br>2.761       | 163.9                                    | 13.9                                       | –                       |

**[K(2.2.2-crypt)]<sub>3</sub>[Co@Ge<sub>10</sub>] · 9 NH<sub>3</sub> (3)**

Compound **3**, [K(2.2.2-crypt)]<sub>3</sub>[Co@Ge<sub>10</sub>] · 9 NH<sub>3</sub>, was isolated from the same reaction solution anion **1a** has been obtained from before. The anion features the pentagonal prismatic ion [Co@Ge<sub>10</sub>]<sup>3-</sup> (**3a**) which has been obtained previously from reactions in en solutions.<sup>19, 20</sup>

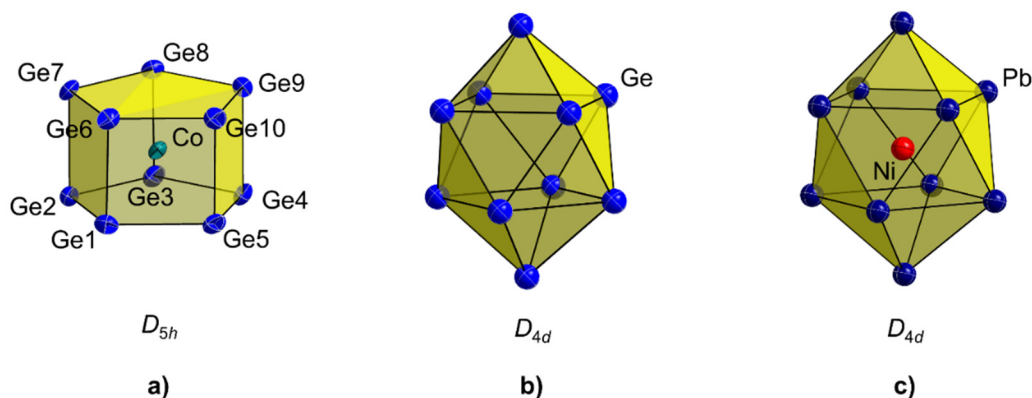

**Figure S1.** Structure of anion **3a** featuring  $D_{5h}$  symmetry. All ellipsoids are presented at a 50 % probability level. b) Structure of the anion [Ge<sub>10</sub>]<sup>2-</sup> with  $D_{4d}$  symmetry.<sup>[21,22]</sup> c) Structure of the anion [Ni@Pb<sub>10</sub>]<sup>2-</sup> with  $D_{4d}$  symmetry.<sup>[23]</sup>

The formation of a pentagonal prism for the Co-filled anion is rather unexpected, as both the empty [Ge<sub>10</sub>]<sup>2-</sup><sup>21, 22</sup> as well as the corresponding Ni-filled Pb<sup>23</sup> cluster feature deltahedral *closo*-clusters, i.e. doubly capped square antiprisms with  $D_{4d}$  symmetry (Figures S3b and c). Theoretical considerations revealed that a size effect has to be taken into account as a possible reason for the formation of the pentagonal prism around the larger Co<sup>-</sup> anion as compared to the smaller Ni<sup>0</sup> atoms or even unoccupied voids.<sup>24</sup> As the  $h/e$  ratio ( $h$ : height of prism;  $e$ : lengths of edges of the pentagonal surfaces) is close to 1, a polyhedron with  $D_{5h}$  symmetry results.

**Table S5.** Summary of interatomic distances in **3a**, the previously published [Co@Ge<sub>10</sub>]<sup>3-</sup> anions<sup>[21]</sup> and the empty anion [Ge<sub>10</sub>]<sup>2-</sup>.<sup>[19,20]</sup>

|                                                    | $d(\text{Ge}-\text{Ge})_{\text{edge}} / \text{\AA}$ | $d(\text{Ge}-\text{Ge})_{\text{height}} / \text{\AA}$ | $d(\text{Co}-\text{Ge}) / \text{\AA}$ | volume / $\text{\AA}^3$ | $h_{\text{max}}/e_{\text{min}}$ | symmetry |
|----------------------------------------------------|-----------------------------------------------------|-------------------------------------------------------|---------------------------------------|-------------------------|---------------------------------|----------|
| <b>3a</b> [Co@Ge <sub>10</sub> ] <sup>3-</sup>     | 2.501(2) –<br>2.538(2)                              | 2.583(2) –<br>2.621(2)                                | 2.494(2) –<br>2.516(2)                | 28.58                   | 1.05                            | $D_{5h}$ |
| [Co@Ge <sub>10</sub> ] <sup>3-</sup> <sup>19</sup> | 2.502 – 2.527                                       | 2.600 –<br>2.622                                      | 2.479 – 2.525                         | 28.55                   | 1.05                            | $D_{5h}$ |
| [Co@Ge <sub>10</sub> ] <sup>3-</sup> <sup>20</sup> | 2.508 – 2.530                                       | 2.596 –<br>2.609                                      | 2.488 – 2.514                         | 28.45                   | 1.04                            | $D_{5h}$ |
| [Ge <sub>10</sub> ] <sup>2-</sup> <sup>21</sup>    | 2.543 – 2.822                                       | –                                                     | –                                     | 26.95                   | –                               | $D_{4d}$ |

**Table S6.** Selected interatomic distances in **3a**.

| <b>atoms</b> | <b>distance / Å</b> | <b>atoms</b> | <b>distance / Å</b> |
|--------------|---------------------|--------------|---------------------|
| Ge1-Ge2      | 2.511(2)            | Ge1-Co       | 2.511(2)            |
| Ge1-Ge5      | 2.538(2)            | Ge2-Co       | 2.503(2)            |
| Ge1-Ge6      | 2.593(2)            | Ge3-Co       | 2.494(2)            |
| Ge2-Ge3      | 2.536(2)            | Ge4-Co       | 2.501(2)            |
| Ge2-Ge7      | 2.605(2)            | Ge5-Co       | 2.512(2)            |
| Ge3-Ge4      | 2.518(2)            | Ge6-Co       | 2.509(2)            |
| Ge3-Ge8      | 2.611(2)            | Ge7-Co       | 2.516(2)            |
| Ge4-Ge5      | 2.523(2)            | Ge8-Co       | 2.512(2)            |
| Ge4-Ge9      | 2.621(2)            | Ge9-Co       | 2.507(2)            |
| Ge5-Ge10     | 2.583(2)            | Ge10-Co      | 2.512(2)            |
| Ge6-Ge7      | 2.513(2)            |              |                     |
| Ge6-Ge10     | 2.516(2)            |              |                     |
| Ge7-Ge8      | 2.520(2)            |              |                     |
| Ge8-Ge9      | 2.523(2)            |              |                     |
| Ge9-Ge10     | 2.501(2)            |              |                     |

### 3. ESI MS sample preparation and spectra of 2a

ESI MS spectra of the reaction mixture were performed from (A) the solid precipitate and (B) the reaction solution after two months (Figure S4).

A: The supernatant solution was removed using a syringe, and the remaining dark precipitate was subsequently dissolved in dmf, filtered through a syringe filter and injected into the ESI MS.

B: An aliquot of the reaction solution (en) was diluted with dmf, filtered through a syringe filter and injected into the ESI MS.

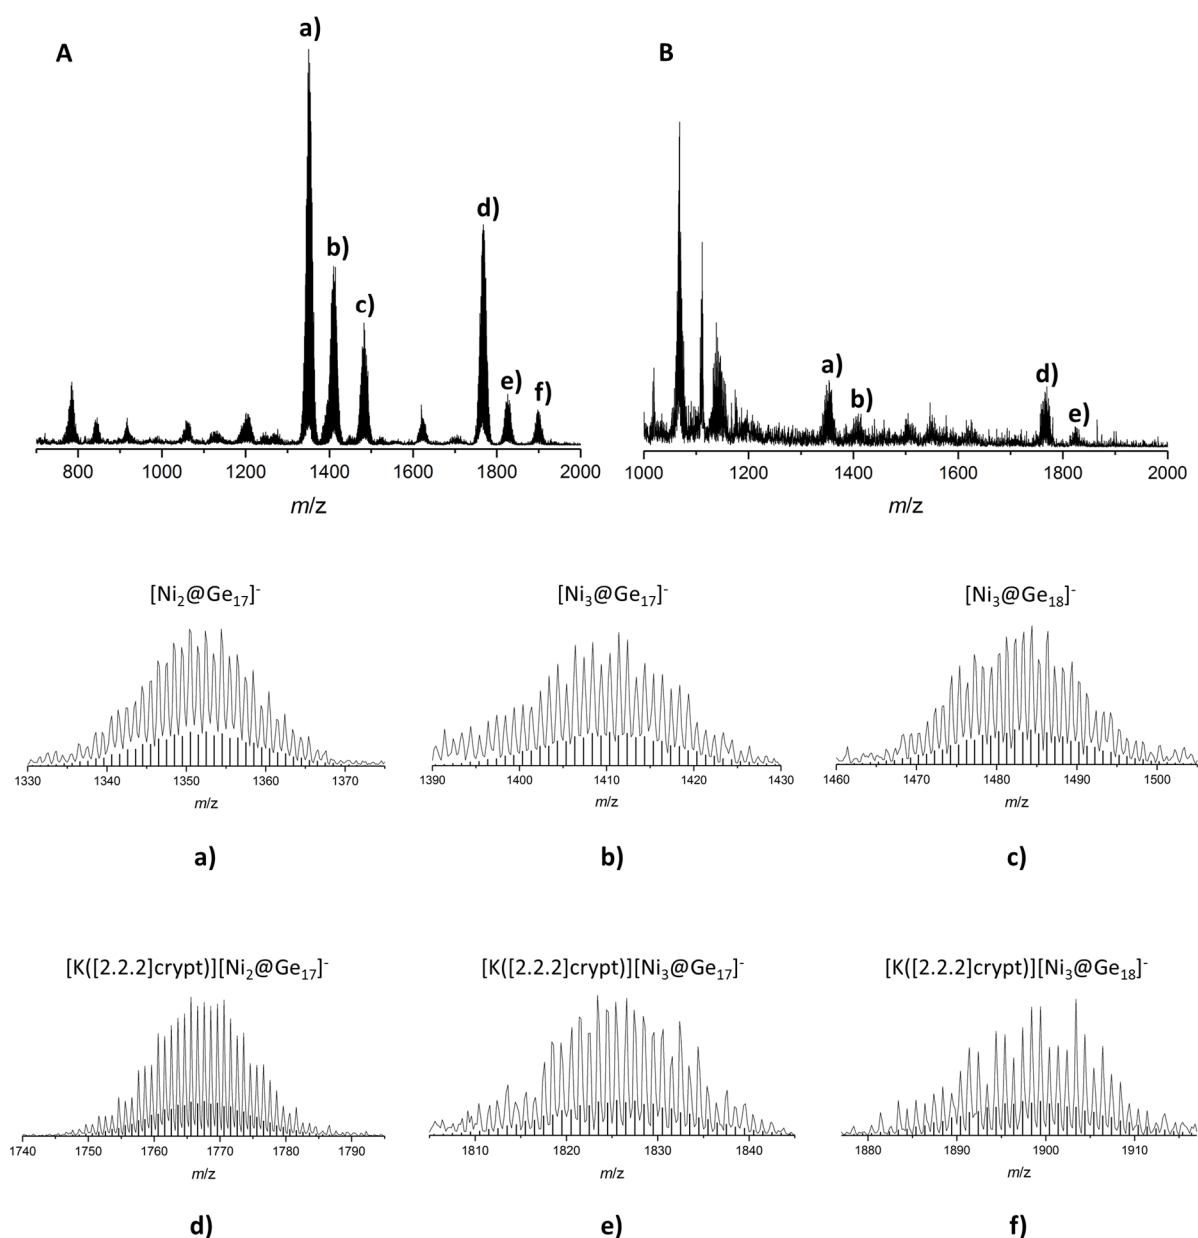

**Figure S2.** A: ESI MS spectrum of the precipitate of the reaction of  $\text{K}_4\text{Ge}_9$ ,  $\text{Ni}(\text{cod})_2$  and [2.2.2]crypt recorded in dmf (negative ion mode, 2000V, 300 °C); B: ESI MS spectrum of the reaction solution of the reaction of  $\text{K}_4\text{Ge}_9$ ,  $\text{Ni}(\text{cod})_2$  and [2.2.2]crypt recorded in dmf (negative ion mode, 2000V, 300 °C). The following molecule peaks are monitored: a)  $[\text{Ni}_2@\text{Ge}_{17}]^-$  ( $m/z$  1352.5), b)  $[\text{Ni}_3@\text{Ge}_{17}]^-$  ( $m/z$  1410.3), c)  $[\text{Ni}_3@\text{Ge}_{18}]^-$  ( $m/z$  1482.4), d)  $[\text{K}([2.2.2]\text{crypt})][\text{Ni}_2@\text{Ge}_{17}]^-$  ( $m/z$  1767.8), e)  $[\text{K}([2.2.2]\text{crypt})][\text{Ni}_3@\text{Ge}_{17}]^-$  ( $m/z$  1825.5), and f)  $[\text{K}([2.2.2]\text{crypt})][\text{Ni}_3@\text{Ge}_{18}]^-$  ( $m/z$  1899.4). Calculated isotope patterns are presented as black bars.

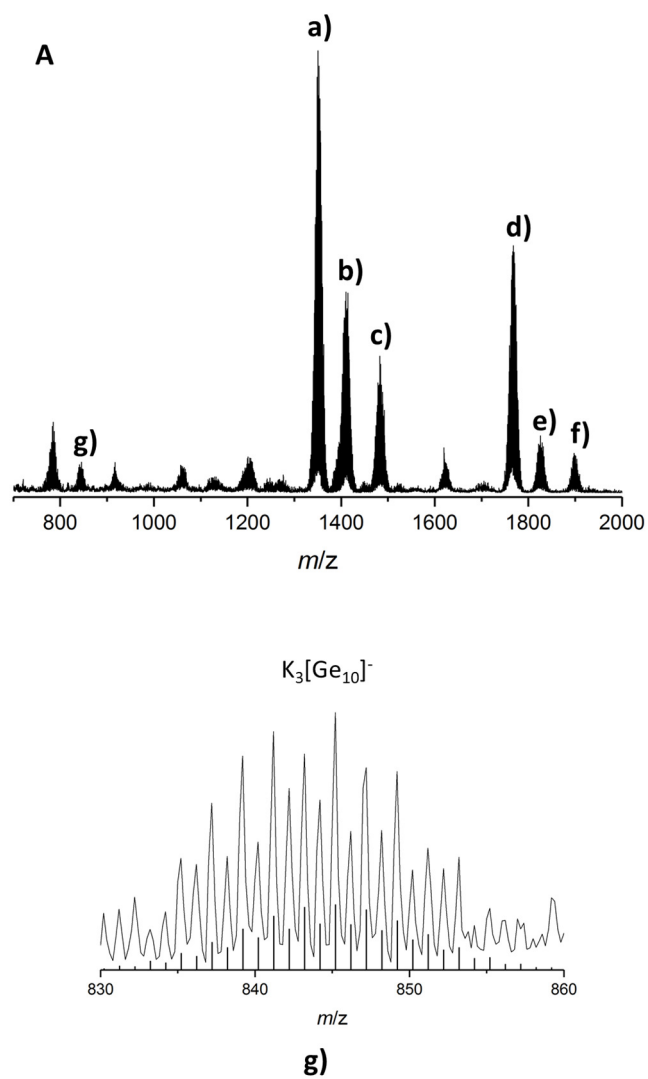

**Figure S5.** A: ESI MS spectrum of the precipitate of the reaction of  $K_4Ge_9$ ,  $Ni(cod)_2$  and [2.2.2]crypt recorded in dmf (negative ion mode, 2000V, 300 °C); a) - f) see Figure S4; g)  $K_3[Ge_{10}]^-$  ( $m/z$  843.1). Calculated isotope pattern is presented as black bars.

## 4. EDX analysis

### Spectrum details

Project: CW-112.ipj  
Spectrum name: Spectrum4

### Acquisition conditions

Acquisition time (s) : 200.0  
Accelerating voltage (kV) : 15.0

Process time : 4

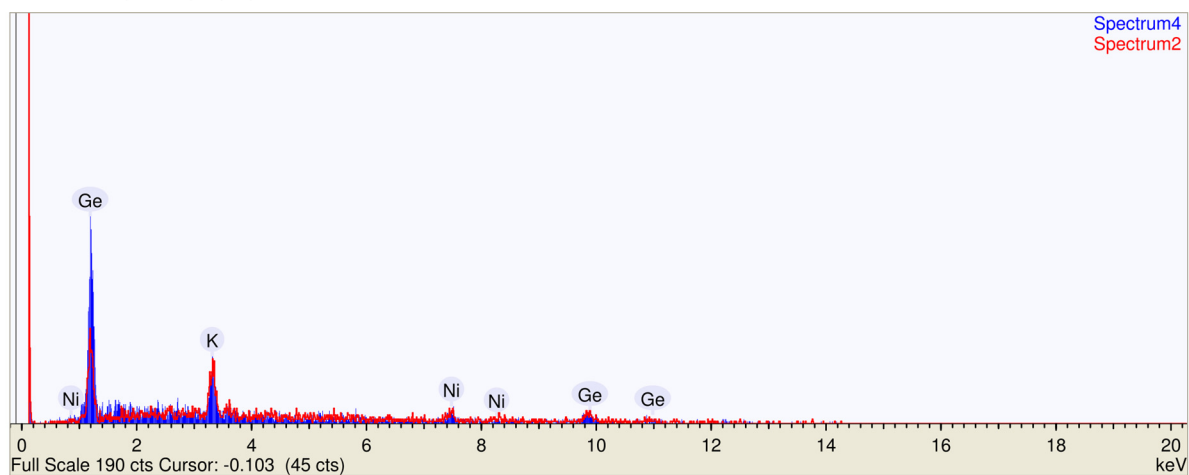

**Figure S6.** Qualitative EDX spectra of compound **2**. The red and blue lines resemble two point measurements at different crystal sites.

Single crystals of **2** were isolated from a heterogeneous/amorphous precipitate, thus hampering a quantitative EDX analysis. For compounds **1** and **3**, which were obtained from reactions in liquid ammonia, EDX measurements were not possible.

## 5. Computational details

**Table S7.** Summarized results of the structure optimization based on the single crystal diffraction data.

| initial structure                             | optimized symmetry | total molecular energy / eV | HOMO-LUMO gap / eV | TM-Ge-TM (optimized) / deg | TM-Ge-TM (experimental) / deg | MO number | electrons (total) | lowest vibration frequency / $\text{cm}^{-1}$ |
|-----------------------------------------------|--------------------|-----------------------------|--------------------|----------------------------|-------------------------------|-----------|-------------------|-----------------------------------------------|
| $[\text{Co}_2@\text{Ge}_{17}]^{6-}$           | s4                 | -1035966.5                  | 2.95770            | 180.00                     | 166.79                        | 906       | 604               | 15.60                                         |
| $\text{K}_4[\text{Co}_2@\text{Ge}_{17}]^{2-}$ | d2d                | -1101243.8                  | 2.83937            | 168.86                     | 166.79                        | 1038      | 676               | 21.00                                         |
| $[\text{Ni}_2@\text{Ge}_{17}]^{4-}$           | c1                 | -1042795.9                  | 2.85455            | 146.51                     | 148.34                        | 906       | 604               | 19.99                                         |

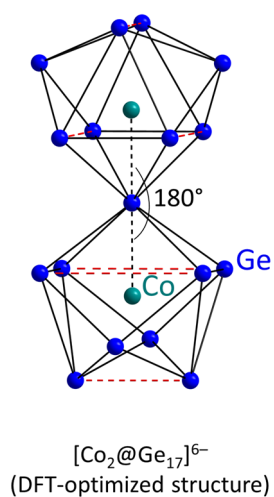

**Figure S7.** DFT-optimized structure of the anion  $[\text{Co}_2@\text{Ge}_{17}]^{6-}$  with a linear arrangement of the strand Co-Ge-Co caused by the neglect of  $\text{K}^+$  cations.

Additional DFT calculations were carried out to investigate the character of the element connecting the  $[\text{Ge}_8]$  tubs in **2a**. Based on the results of the single crystal structure data of anion **2a**, the atom Ge5 was substituted by Ni, and the fourfold negative charge was kept. The structure refinement revealed a fused structure not congruent to the initial crystal structure data corroborating the interconnecting atom to be Ge (rather than Ni).

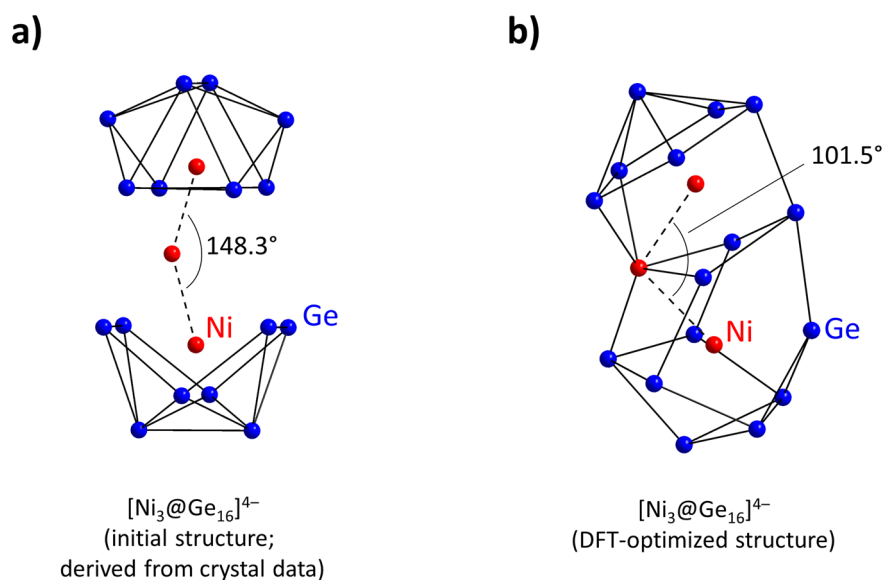

**Figure S8.** DFT-optimization for the theoretical anion  $[\text{Ni}_3@ \text{Ge}_{16}]^{4-}$ . a) Initial structure with substitution of the cage-connecting atom Ge5 by Ni (derived from the single crystal structure data of anion **2a**); b) optimized structure of the theoretical anion  $[\text{Ni}_3@ \text{Ge}_{16}]^{4-}$ .



## Atomic coordinates and vibrational data

### [Co<sub>2</sub>@Ge<sub>17</sub>]<sup>6-</sup>

#### atomic coordinates

|    |            |            |            |
|----|------------|------------|------------|
| Ge | 1.3560329  | -0.0065502 | 4.1144867  |
| Ge | -0.0033006 | 2.1565276  | 3.2407876  |
| Ge | -1.3560329 | 0.0065502  | 4.1144867  |
| Ge | 0.0033006  | -2.1565276 | 3.2407876  |
| Ge | 1.9151593  | -1.3239414 | 1.5770737  |
| Ge | 1.9311641  | 1.2776155  | 1.5819224  |
| Ge | -1.9151593 | 1.3239414  | 1.5770737  |
| Ge | -1.9311641 | -1.2776155 | 1.5819224  |
| Ge | -0.0000000 | 0.0000000  | 0.0000000  |
| Ge | -1.2776155 | 1.9311641  | -1.5819224 |
| Ge | 1.3239414  | 1.9151593  | -1.5770737 |
| Ge | 1.2776155  | -1.9311641 | -1.5819224 |
| Ge | -1.3239414 | -1.9151593 | -1.5770737 |
| Ge | -2.1565276 | -0.0033006 | -3.2407876 |
| Ge | 0.0065502  | 1.3560329  | -4.1144867 |
| Ge | -0.0065502 | -1.3560329 | -4.1144867 |
| Ge | 2.1565276  | 0.0033006  | -3.2407876 |
| Co | 0.0000000  | 0.0000000  | 2.1571425  |
| Co | 0.0000000  | -0.0000000 | -2.1571425 |

#### Vibrational spectrum

| mode | symmetry | wave number<br>cm <sup>-1</sup> | IR intensity<br>kJ/mol | selection rules |       |
|------|----------|---------------------------------|------------------------|-----------------|-------|
|      |          |                                 |                        | IR              | RAMAN |
| 1    |          | -0.00                           | 0.00000                | -               | -     |
| 2    |          | -0.00                           | 0.00000                | -               | -     |
| 3    |          | 0.00                            | 0.00000                | -               | -     |
| 4    |          | 0.00                            | 0.00000                | -               | -     |
| 5    |          | 0.00                            | 0.00000                | -               | -     |
| 6    |          | 0.00                            | 0.00000                | -               | -     |
| 7    | e        | 15.60                           | 0.09165                | YES             | YES   |
| 8    | e        | 15.60                           | 0.09165                | YES             | YES   |
| 9    | b        | 39.38                           | 0.07528                | YES             | YES   |
| 10   | e        | 46.44                           | 0.10409                | YES             | YES   |
| 11   | e        | 46.44                           | 0.10409                | YES             | YES   |
| 12   | a        | 69.87                           | 0.00000                | NO              | YES   |
| 13   | e        | 74.44                           | 0.52083                | YES             | YES   |
| 14   | e        | 74.44                           | 0.52083                | YES             | YES   |

|    |   |        |          |     |     |
|----|---|--------|----------|-----|-----|
| 15 | a | 79.90  | 0.00000  | NO  | YES |
| 16 | b | 89.72  | 0.04484  | YES | YES |
| 17 | b | 92.77  | 0.55718  | YES | YES |
| 18 | e | 94.13  | 0.03654  | YES | YES |
| 19 | e | 94.13  | 0.03654  | YES | YES |
| 20 | a | 103.01 | 0.00000  | NO  | YES |
| 21 | a | 106.89 | 0.00000  | NO  | YES |
| 22 | e | 108.44 | 0.62780  | YES | YES |
| 23 | e | 108.44 | 0.62780  | YES | YES |
| 24 | b | 116.51 | 0.20393  | YES | YES |
| 25 | a | 117.16 | 0.00000  | NO  | YES |
| 26 | b | 120.38 | 2.89831  | YES | YES |
| 27 | a | 130.90 | 0.00000  | NO  | YES |
| 28 | b | 132.78 | 0.60244  | YES | YES |
| 29 | e | 134.53 | 0.00145  | YES | YES |
| 30 | e | 134.53 | 0.00145  | YES | YES |
| 31 | a | 140.08 | 0.00000  | NO  | YES |
| 32 | b | 140.53 | 0.19622  | YES | YES |
| 33 | e | 146.45 | 1.52459  | YES | YES |
| 34 | e | 146.45 | 1.52459  | YES | YES |
| 35 | e | 156.64 | 11.52067 | YES | YES |
| 36 | e | 156.64 | 11.52067 | YES | YES |
| 37 | b | 169.46 | 38.75330 | YES | YES |
| 38 | e | 172.09 | 14.52318 | YES | YES |
| 39 | e | 172.09 | 14.52318 | YES | YES |
| 40 | b | 196.97 | 0.16824  | YES | YES |
| 41 | a | 197.63 | 0.00000  | NO  | YES |
| 42 | e | 200.39 | 2.23392  | YES | YES |
| 43 | e | 200.39 | 2.23392  | YES | YES |
| 44 | a | 201.79 | 0.00000  | NO  | YES |
| 45 | b | 208.70 | 2.26865  | YES | YES |
| 46 | e | 213.54 | 1.84934  | YES | YES |
| 47 | e | 213.54 | 1.84934  | YES | YES |
| 48 | a | 215.36 | 0.00000  | NO  | YES |
| 49 | b | 227.57 | 1.99460  | YES | YES |
| 50 | a | 230.09 | 0.00000  | NO  | YES |
| 51 | b | 270.72 | 2.54305  | YES | YES |
| 52 | e | 314.98 | 18.18693 | YES | YES |
| 53 | e | 314.98 | 18.18693 | YES | YES |
| 54 | e | 361.12 | 47.18061 | YES | YES |
| 55 | e | 361.12 | 47.18061 | YES | YES |

|    |   |        |           |     |     |
|----|---|--------|-----------|-----|-----|
| 56 | a | 385.67 | 0.00000   | NO  | YES |
| 57 | b | 469.37 | 210.07783 | YES | YES |

### K<sub>4</sub>[Co<sub>2</sub>@Ge<sub>17</sub>]<sup>2-</sup>

#### atomic coordinates

|    |            |            |            |
|----|------------|------------|------------|
| Ge | -4.1476467 | 1.1478481  | -1.1047862 |
| Ge | -3.7933833 | -1.3499229 | -0.3649102 |
| Ge | -3.3706738 | -0.7446066 | -2.9360878 |
| Ge | -2.3011043 | 1.7170288  | -2.8905459 |
| Ge | -1.5589924 | 2.3185322  | -0.3637549 |
| Ge | -2.4855640 | 0.4455914  | 1.1855808  |
| Ge | -1.5362855 | -2.2340971 | -1.4746022 |
| Ge | -0.6224152 | -0.3491917 | -3.0323931 |
| Ge | -0.0047280 | -0.1101668 | -0.1938808 |
| Ge | 1.3016870  | -2.2939703 | 1.1859579  |
| Ge | 0.2367783  | -0.4346780 | 2.6843332  |
| Ge | 1.5038194  | 2.3070523  | 0.3570030  |
| Ge | 2.6301866  | 0.5446762  | -1.2077902 |
| Ge | 3.6890702  | -1.4367933 | 0.2901374  |
| Ge | 3.0992784  | -0.9319332 | 2.8163964  |
| Ge | 4.0327310  | 1.0369305  | 1.1481984  |
| Ge | 2.0452610  | 1.5252809  | 2.8538726  |
| Co | -1.9760046 | 0.0887625  | -1.1120958 |
| Co | 1.8402390  | 0.0141906  | 0.9680420  |
| K  | -1.9491870 | -3.2011548 | 1.9705887  |
| K  | 1.0426230  | 2.7972752  | -3.2719113 |
| K  | 1.8398530  | -2.7809648 | -2.4087313 |
| K  | -1.1038570 | 3.0171852  | 3.1623387  |

#### Vibrational spectrum

| mode | symmetry | wave number      | IR intensity | selection rules |       |
|------|----------|------------------|--------------|-----------------|-------|
|      |          | cm <sup>-1</sup> | kJ/mol       | IR              | RAMAN |
| 1    |          | -0.00            | 0.00000      | -               | -     |
| 2    |          | -0.00            | 0.00000      | -               | -     |
| 3    |          | -0.00            | 0.00000      | -               | -     |
| 4    |          | -0.00            | 0.00000      | -               | -     |
| 5    |          | 0.00             | 0.00000      | -               | -     |
| 6    |          | 0.00             | 0.00000      | -               | -     |
| 7    | a        | 21.00            | 0.48817      | YES             | YES   |
| 8    | a        | 27.20            | 0.42934      | YES             | YES   |
| 9    | a        | 33.89            | 3.39896      | YES             | YES   |

|    |   |        |          |     |     |
|----|---|--------|----------|-----|-----|
| 10 | a | 36.18  | 0.52749  | YES | YES |
| 11 | a | 38.27  | 11.77906 | YES | YES |
| 12 | a | 44.94  | 10.66707 | YES | YES |
| 13 | a | 47.18  | 2.76524  | YES | YES |
| 14 | a | 51.44  | 0.23684  | YES | YES |
| 15 | a | 53.29  | 1.42739  | YES | YES |
| 16 | a | 54.16  | 0.12685  | YES | YES |
| 17 | a | 65.50  | 1.69950  | YES | YES |
| 18 | a | 67.94  | 6.39345  | YES | YES |
| 19 | a | 72.03  | 5.16110  | YES | YES |
| 20 | a | 72.84  | 10.82004 | YES | YES |
| 21 | a | 74.51  | 7.77268  | YES | YES |
| 22 | a | 75.33  | 7.09274  | YES | YES |
| 23 | a | 79.74  | 0.86834  | YES | YES |
| 24 | a | 81.17  | 11.84953 | YES | YES |
| 25 | a | 86.26  | 25.55502 | YES | YES |
| 26 | a | 87.40  | 15.42050 | YES | YES |
| 27 | a | 89.79  | 5.92656  | YES | YES |
| 28 | a | 90.46  | 26.98226 | YES | YES |
| 29 | a | 95.13  | 3.06232  | YES | YES |
| 30 | a | 97.80  | 21.21377 | YES | YES |
| 31 | a | 99.74  | 17.01889 | YES | YES |
| 32 | a | 101.29 | 1.20026  | YES | YES |
| 33 | a | 105.50 | 2.25921  | YES | YES |
| 34 | a | 108.51 | 2.68477  | YES | YES |
| 35 | a | 112.47 | 1.86096  | YES | YES |
| 36 | a | 116.77 | 0.08316  | YES | YES |
| 37 | a | 118.13 | 0.42756  | YES | YES |
| 38 | a | 121.24 | 1.37018  | YES | YES |
| 39 | a | 135.75 | 0.13492  | YES | YES |
| 40 | a | 139.97 | 0.06879  | YES | YES |
| 41 | a | 143.89 | 1.82066  | YES | YES |
| 42 | a | 146.70 | 2.77360  | YES | YES |
| 43 | a | 147.00 | 3.68836  | YES | YES |
| 44 | a | 150.73 | 4.87695  | YES | YES |
| 45 | a | 152.13 | 1.65690  | YES | YES |
| 46 | a | 154.96 | 4.10554  | YES | YES |
| 47 | a | 155.86 | 8.30558  | YES | YES |
| 48 | a | 157.74 | 7.38886  | YES | YES |
| 49 | a | 166.07 | 20.57558 | YES | YES |
| 50 | a | 173.51 | 11.11562 | YES | YES |

|    |   |        |           |     |     |
|----|---|--------|-----------|-----|-----|
| 51 | a | 176.58 | 12.21596  | YES | YES |
| 52 | a | 192.63 | 0.59006   | YES | YES |
| 53 | a | 199.41 | 0.64662   | YES | YES |
| 54 | a | 200.61 | 2.23459   | YES | YES |
| 55 | a | 200.89 | 2.41250   | YES | YES |
| 56 | a | 202.73 | 3.42174   | YES | YES |
| 57 | a | 202.92 | 4.72449   | YES | YES |
| 58 | a | 205.49 | 0.64645   | YES | YES |
| 59 | a | 205.73 | 0.69155   | YES | YES |
| 60 | a | 212.36 | 0.06783   | YES | YES |
| 61 | a | 225.70 | 1.78546   | YES | YES |
| 62 | a | 231.98 | 0.12192   | YES | YES |
| 63 | a | 257.33 | 2.05690   | YES | YES |
| 64 | a | 306.44 | 14.69350  | YES | YES |
| 65 | a | 307.60 | 16.05865  | YES | YES |
| 66 | a | 357.09 | 30.51728  | YES | YES |
| 67 | a | 360.51 | 44.07716  | YES | YES |
| 68 | a | 364.50 | 14.13907  | YES | YES |
| 69 | a | 439.63 | 206.04614 | YES | YES |

#### **[Ni<sub>2</sub>@Ge<sub>17</sub>]<sup>4-</sup>**

atomic coordinates

|    |            |            |            |
|----|------------|------------|------------|
| Ge | -0.0904626 | -4.1806707 | -1.2621903 |
| Ge | 1.3164729  | -1.9778556 | -2.0699121 |
| Ge | 2.0740268  | -3.4016310 | 0.1189707  |
| Ge | -2.2431026 | -3.1242658 | 0.0219819  |
| Ge | -0.1132455 | -4.0208440 | 1.4541951  |
| Ni | -0.0140932 | -2.1074819 | -0.0234505 |
| Ge | 0.5300271  | -0.0048490 | -0.4000329 |
| Ge | -1.3106530 | -1.6574565 | -1.9998425 |
| Ge | 1.2160596  | -1.5190146 | 1.9508433  |
| Ge | -1.3511541 | -1.3833792 | 1.8200824  |
| Ge | 1.8396178  | 1.7179305  | 1.5537735  |
| Ge | 2.2296747  | 1.9970337  | -1.0588110 |
| Ni | 0.0309564  | 2.1033835  | 0.0080404  |
| Ge | -1.7555836 | 1.4723244  | -1.4566859 |
| Ge | -1.9635036 | 1.3717833  | 1.0997029  |
| Ge | 1.2370543  | 4.1888995  | 0.2276000  |
| Ge | -0.3135678 | 3.1451307  | 2.2033691  |
| Ge | 0.1401941  | 3.3726097  | -2.0938694 |
| Ge | -1.4587175 | 4.0083528  | -0.093764  |

Vibrational spectrum

| mode | symmetry | wave number<br>cm <sup>-1</sup> | IR intensity<br>kJ/mol | selecti on rules |       |
|------|----------|---------------------------------|------------------------|------------------|-------|
|      |          |                                 |                        | IR               | RAMAN |
| 1    |          | -0.00                           | 0.00000                | -                | -     |
| 2    |          | 0.00                            | 0.00000                | -                | -     |
| 3    |          | 0.00                            | 0.00000                | -                | -     |
| 4    |          | 0.00                            | 0.00000                | -                | -     |
| 5    |          | 0.00                            | 0.00000                | -                | -     |
| 6    |          | 0.00                            | 0.00000                | -                | -     |
| 7    | a        | 19.99                           | 0.44780                | YES              | YES   |
| 8    | a        | 27.30                           | 0.01066                | YES              | YES   |
| 9    | a        | 35.75                           | 0.07010                | YES              | YES   |
| 10   | a        | 39.89                           | 0.11450                | YES              | YES   |
| 11   | a        | 47.34                           | 0.02792                | YES              | YES   |
| 12   | a        | 63.65                           | 0.34392                | YES              | YES   |
| 13   | a        | 65.57                           | 0.01710                | YES              | YES   |
| 14   | a        | 75.35                           | 0.46010                | YES              | YES   |
| 15   | a        | 81.34                           | 0.15045                | YES              | YES   |
| 16   | a        | 87.39                           | 0.03589                | YES              | YES   |
| 17   | a        | 91.02                           | 0.53639                | YES              | YES   |
| 18   | a        | 92.53                           | 0.42975                | YES              | YES   |
| 19   | a        | 98.96                           | 1.10198                | YES              | YES   |
| 20   | a        | 99.47                           | 1.36175                | YES              | YES   |
| 21   | a        | 102.84                          | 0.28583                | YES              | YES   |
| 22   | a        | 103.35                          | 0.60777                | YES              | YES   |
| 23   | a        | 109.13                          | 1.94384                | YES              | YES   |
| 24   | a        | 112.94                          | 0.07222                | YES              | YES   |
| 25   | a        | 122.76                          | 3.14962                | YES              | YES   |
| 26   | a        | 129.37                          | 0.02850                | YES              | YES   |
| 27   | a        | 130.73                          | 0.89868                | YES              | YES   |
| 28   | a        | 132.42                          | 0.01696                | YES              | YES   |
| 29   | a        | 138.98                          | 0.47940                | YES              | YES   |
| 30   | a        | 141.25                          | 3.54189                | YES              | YES   |
| 31   | a        | 141.92                          | 1.42124                | YES              | YES   |
| 32   | a        | 142.52                          | 0.15646                | YES              | YES   |
| 33   | a        | 143.86                          | 0.16772                | YES              | YES   |
| 34   | a        | 146.19                          | 0.36600                | YES              | YES   |
| 35   | a        | 148.16                          | 0.56555                | YES              | YES   |
| 36   | a        | 152.52                          | 3.70365                | YES              | YES   |
| 37   | a        | 153.35                          | 3.79684                | YES              | YES   |

|    |   |        |          |     |     |
|----|---|--------|----------|-----|-----|
| 38 | a | 167.58 | 6.42386  | YES | YES |
| 39 | a | 169.25 | 5.89241  | YES | YES |
| 40 | a | 192.79 | 0.77813  | YES | YES |
| 41 | a | 193.01 | 0.61960  | YES | YES |
| 42 | a | 196.53 | 0.19297  | YES | YES |
| 43 | a | 198.99 | 2.97817  | YES | YES |
| 44 | a | 200.80 | 0.55939  | YES | YES |
| 45 | a | 202.78 | 2.25243  | YES | YES |
| 46 | a | 204.32 | 0.40238  | YES | YES |
| 47 | a | 205.81 | 0.26254  | YES | YES |
| 48 | a | 211.82 | 0.01377  | YES | YES |
| 49 | a | 221.79 | 2.80620  | YES | YES |
| 50 | a | 227.18 | 0.09801  | YES | YES |
| 51 | a | 251.85 | 0.00653  | YES | YES |
| 52 | a | 286.04 | 7.41579  | YES | YES |
| 53 | a | 287.14 | 11.01077 | YES | YES |
| 54 | a | 330.32 | 21.64704 | YES | YES |
| 55 | a | 330.91 | 28.75105 | YES | YES |
| 56 | a | 337.96 | 0.68157  | YES | YES |
| 57 | a | 405.96 | 82.97496 | YES | YES |

## 6. References

1. B. J. Witzel, W. Klein, J. V. Dums, M. Boyko and T. F. Fässler, *Angew. Chem. Int. Ed.*, **2019**, *58*, 12908.
2. C. B. Benda, M. Waibel and T. F. Fässler, *Angew. Chem. Int. Ed.*, **2015**, *54*, 522.
3. T. Kottke and D. Stalke, *J. Appl. Crystallogr.*, **1993**, *26*, 615.
4. G. M. Sheldrick, *Acta Crystallogr., Sect. C: Struct. Chem.*, **2015**, *71*, 3.
5. K. Momma and F. Izumi, *J. Appl. Crystallogr.*, **2011**, *44*, 1272.
6. TURBOMOLE V7.3 2018, a development of University of Karlsruhe and Forschungszentrum Karlsruhe GmbH, 1989-2007, TURBOMOLE GmbH, since 2007; available from [www.turbomole.com](http://www.turbomole.com).
7. J. P. Perdew, K. Burke and M. Ernzerhof, *Phys. Rev. Lett.*, **1996**, *77*, 3865.
8. C. Adamo and V. Barone, *J. Chem. Phys.*, **1999**, *110*, 6158.
9. F. Weigend and R. Ahlrichs, *Phys. Chem. Chem. Phys.*, **2005**, *7*, 3297.
10. K. Eichkorn, O. Treutler, H. Öhm, M. Häser and R. Ahlrichs, *Chem. Phys. Lett.*, **1995**, *240*, 283.
11. F. Weigend, *Phys. Chem. Chem. Phys.*, **2006**, *8*, 1057.
12. M. Sierka, A. Hogekamp and R. Ahlrichs, *J. Chem. Phys.*, **2003**, *118*, 9136.
13. A. Klamt and G. Schüürmann, *J. Chem. Soc. Perkin Trans. 2*, **1993**, 799.
14. J. M. Goicoechea and S. C. Sevov, *Angew. Chem. Int. Ed.*, **2005**, *44*, 4026.
15. S. Ponou and T. F. Faessler, *Z. Anorg. Allg. Chem.*, **2007**, *633*, 393.
16. J. M. Goicoechea and S. C. Sevov, *J. Am. Chem. Soc.*, **2006**, *128*, 4155.
17. E. N. Esenturk, J. C. Fettinger and B. W. Eichhorn, *J. Am. Chem. Soc.*, **2006**, *128*, 12.
18. C. Liu, X. Jin, L. Li, J. Xu, J. E. McGrady and Z.-M. Sun, *Chem. Sci.*, **2019**, *10*, 4394.
19. J. Q. Wang, S. Stegmaier and T. F. Fässler, *Angew. Chem. Int. Ed.*, **2009**, *48*, 1998.
20. C. Liu, L. J. Li, I. A. Popov, R. J. Wilson, C. Q. Xu, J. Li, A. I. Boldyrev and Z. M. Sun, *Chin. J. Chem.*, **2018**, *36*, 1165.
21. M. M. Bentlohner, C. Fischer and T. F. Fässler, *Chem. Commun.*, **2016**, *52*, 9841.
22. D. Rios and S. C. Sevov, *Inorg. Chem.*, **2010**, *49*, 6396.
23. E. N. Esenturk, J. Fettinger and B. Eichhorn, *Chem. Commun.*, **2005**, 247.
24. M. Uta, D. Cioloboc and R. King, *Inorg. Chem.*, **2012**, *51*, 3498.
